# Supplementary material for: A mechanism for aragonite to post-aragonite transition in MCO3 (M = Ca, Sr and Ba) carbonates: evidence of a hidden metastable polymorph
Source: Royal Society of Chemistry journal article supplement (doi:10.1039/d2cp04209f), 2022-01-01
Supplement: d2cp04209f1.pdf [file d2cp04209f1.pdf]

## Supplementary Information

# A Mechanism for Aragonite to Post-aragonite Transition in $\text{MCO}_3$ ( $\text{M} = \text{Ca}, \text{Sr}$ and $\text{Ba}$ ) Carbonates: Evidence of a hidden metastable polymorph

Miguel A. Salvadó\*, Pilar Pertierra and J. Manuel Recio

MALTA-Consolider Team and Departamento de Química Física y Analítica, Universidad de  
Oviedo, E-33006 Oviedo, Spain

Email: [mass@uniovi.es](mailto:mass@uniovi.es)

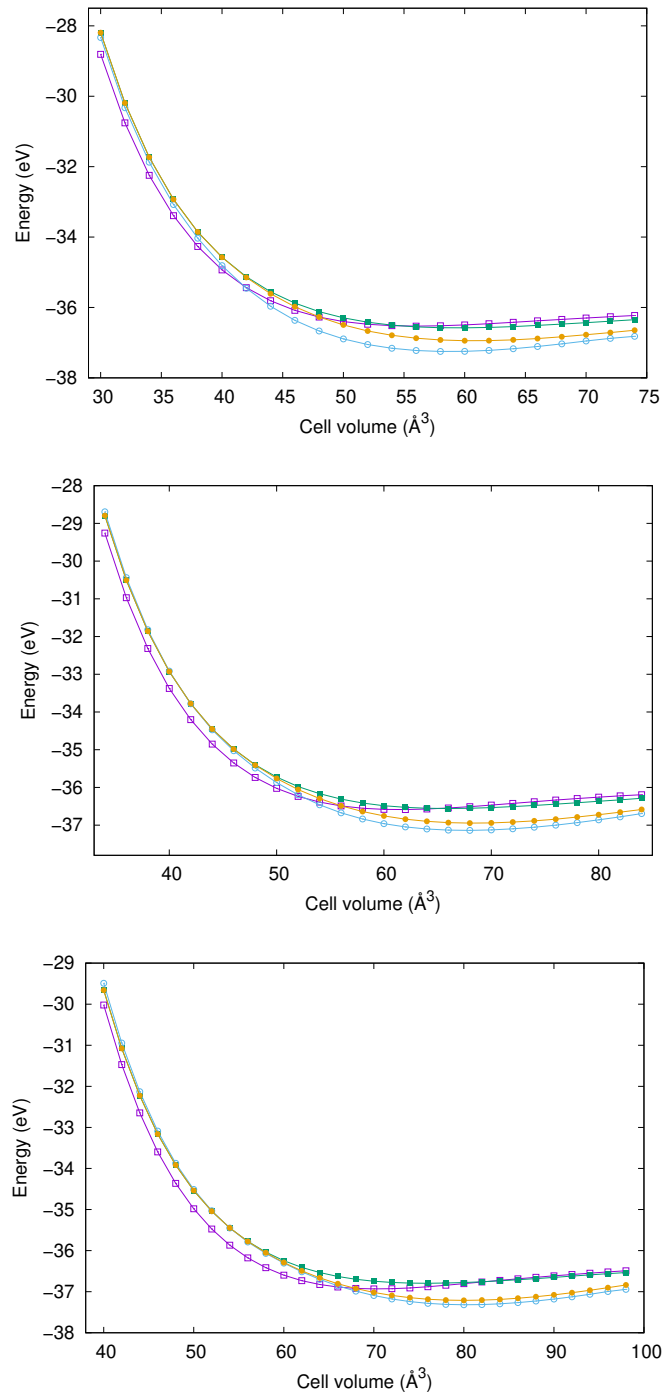

Figure S1: Energy-volume curves of aragonite (blue empty circles), post-aragonite (purple empty squares), *hexa1* (green filled squares), *hexa2* (yellow filled circles) for Ca (top), Sr (middle) and Ba (bottom) carbonates

Table S1: EOS parameters. Energy-volume data fittings using a Birch-Murnaghan third order equation. In order to obtain values easily comparable,  $B'$  was fixed in all cases to 4.0. Unit-cell volume is given per formula unit.

|                          | <i>aragonite</i> |       |       | <i>post-aragonite</i> |       |       | <i>hexa1</i> |       |       | <i>hexa2</i> |       |       |
|--------------------------|------------------|-------|-------|-----------------------|-------|-------|--------------|-------|-------|--------------|-------|-------|
|                          | Ca               | Sr    | Ba    | Ca                    | Sr    | Ba    | Ca           | Sr    | Ba    | Ca           | Sr    | Ba    |
| $V_0$ ( $\text{\AA}^3$ ) | 59.28            | 67.52 | 79.07 | 56.82                 | 63.14 | 72.88 | 58.80        | 65.59 | 75.83 | 60.35        | 67.58 | 78.56 |
| $B_0$ (GPa)              | 64.7             | 52.2  | 41.4  | 67.8                  | 62.2  | 54.5  | 62.7         | 55.0  | 46.4  | 57.8         | 49.9  | 41.2  |

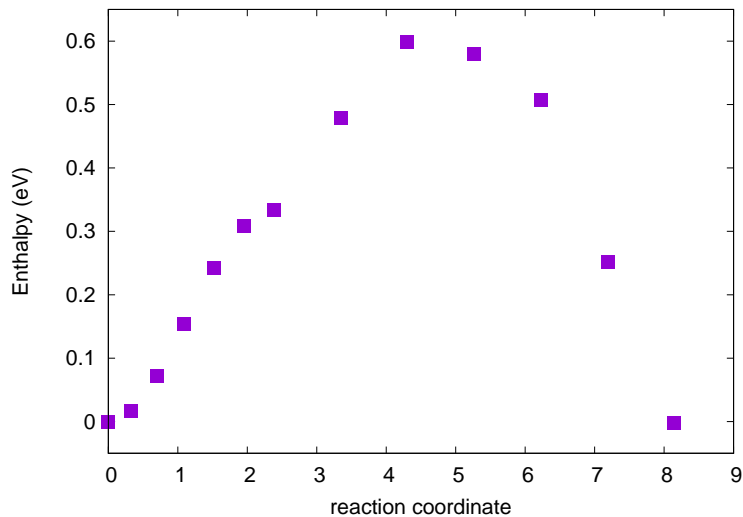

Figure S2: Enthalpy profile of  $\text{CaCO}_3$  aragonite to post-aragonite transition obtained using NEB method

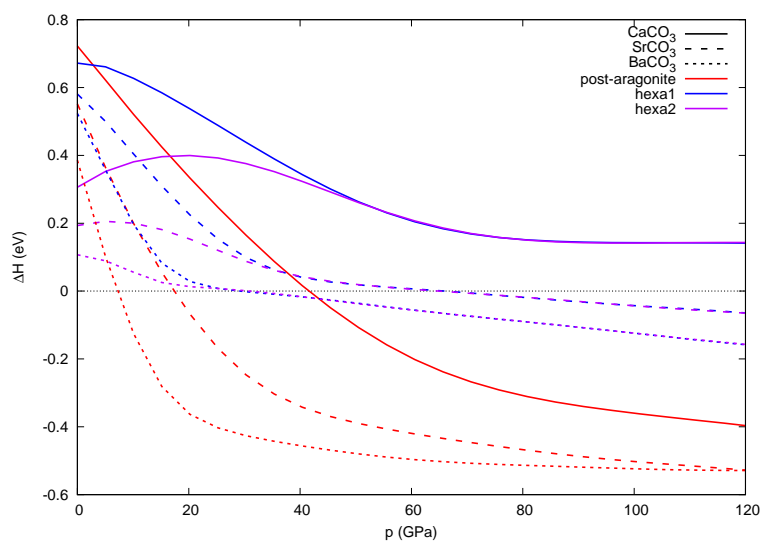

Figure S3: Enthalpy differences relative to the aragonite phase. Line segments joining calculated data points are plotted for greater clarity

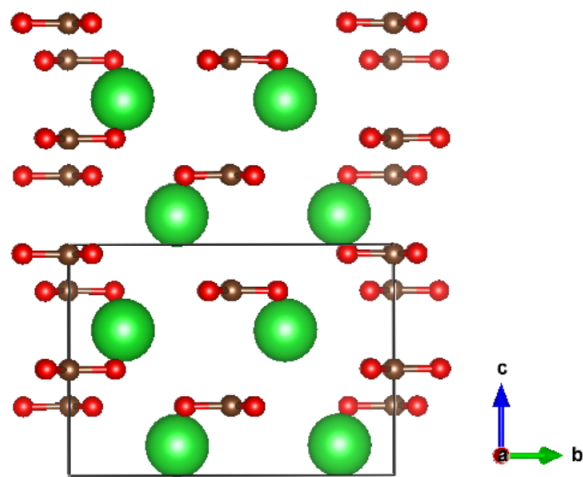

Figure S4: An example of structure for BaCO<sub>3</sub> with carbonate groups alternating *aragonite* and *hexa2* positions. Green, brown, and red balls stand for barium, carbon, and oxygen, respectively.
